# Supplementary material for: Production of eugenol from fungal endophytes Neopestalotiopsis sp. and Diaporthe sp. isolated from Cinnamomum loureiroi leaves
Source: PeerJ. 2019 Feb 12;7:e6427. doi: 10.7717/peerj.6427 (PMC6376936; doi:10.7717/peerj.6427)
Supplement: Supplemental Information 2 — Each sheet represents diameter or MIC of each extract in screening of antimicrobial activity. [file peerj-07-6427-s002.xlsx]

## Sheet: conc 1000 ugmL_antibac
	Gram-positive			Gram-negative
	B. cereus	S. aureus	S. epidermidis	E. coli	P. aeruginosa	S. typhimurium		B. cereus				S. aureus				S. epidermidis					E. coli				P. aeruginosa				S. typhimurium
								1	2	3	SD	1	2	3	SD	1	2	3	SD		1	2	3	SD	1	2	3	SD	1	2	3	SD
MFLUCC15-1112	11.2833	10.2067	8.96	8.07333	8.77	8.45		11.12	11.23	11.5	0.195533	10.1	10.3	10.22	0.100664	9.1	8.9	8.88	0.121655		8	8	8.22	0.127017	8.66	8.77	8.88	0.11	8.22	8.54	8.59	0.200749
MFLUCC15-1113	8.37333	7.20667	7.35333	0	7.91667	0		8.56	8.2	8.36	0.18037	7.1	7.2	7.32	0.110151	7.52	7.21	7.33	0.156312		0	0	0	0	7.88	7.88	7.99	0.0635085	0	0	0	0
MFLUCC15-1130	14.1233	11.7167	13.45	10.75	9.67333	9.10667		14.12	14	14.25	0.125033	12	11.52	11.63	0.251462	13.25	13.5	13.6	0.180278		10.58	10.98	10.69	0.20664	9.65	9.63	9.74	0.0585947	9	9	9.32	0.184752
MFLUCC15-1131	14.37	12.7467	13.1167	10.4033	10.4033	9.22667		14.23	14.53	14.35	0.150997	12.35	12.85	13.04	0.356417	13.14	12.96	13.25	0.146401		10.33	10.22	10.66	0.228983	10.25	10.33	10.63	0.200333	9.12	9.23	9.33	0.10504
MFLUCC15-1132	8.26	7.77667	8.58333	7.35333	6.99333	7.04		8.25	8.26	8.27	0.01	7.56	7.89	7.88	0.187705	8.56	8.96	8.23	0.365559		7.52	7	7.54	0.306159	6.88	6.99	7.11	0.115036	7.12	7	7	0.069282
MFLUCC15-1133	12.4467	10.5733	11.1667	8.46333	8.16667	9.06		12.45	12.56	12.33	0.115036	10.89	10.56	10.27	0.310215	11.12	11	11.38	0.194251		8.5	8.33	8.56	0.119304	8.12	8.22	8.16	0.0503322	8.98	8.99	9.21	0.13
MFLUCC15-1134	8.55333	9.25	9.15	6.68333	0	0		8.56	8.44	8.66	0.110151	9.32	9.21	9.22	0.0608276	9.21	9.23	9.01	0.121655		6.58	6.88	6.59	0.170392	0	0	0	0	0	0	0	0
MFLUCC15-1135	10.42	9.54	10.57	9.13333	9.27333	7.65		10.12	10.56	10.58	0.26	9.63	9.25	9.74	0.257099	10.52	10.23	10.96	0.36756		9.12	9.1	9.18	0.0416333	9.1	9.2	9.52	0.219393	7.5	7.6	7.85	0.180278
MFLUCC15-1136	10.0733	7.13667	7.37333	9.11	8.92333	7.80667		10.22	10	10	0.127017	7.21	7	7.2	0.118462	7.3	7.52	7.3	0.127017		9	9.15	9.18	0.0964365	8.95	8.88	8.94	0.0378594	7.88	7.66	7.88	0.127017
MFLUCC15-1137	7.04	7.07333	7.1	7.76333	0	6.94		7.11	7.01	7	0.0608276	7	7	7.22	0.127017	7.25	7	7.05	0.132288		7.5	7.8	7.99	0.247049	0	0	0	0	6.8	6.9	7.12	0.163707
MFLUCC15-1138	9.70333	10.2567	7.14	9.62333	9.25667	8.12		9.99	9.32	9.8	0.345302	10.2	10.21	10.36	0.0896289	7.12	7	7.3	0.150997		9.5	9.6	9.77	0.136504	9.3	9.22	9.25	0.0404145	8.11	8.12	8.13	0.01
Chloramphenicol	12.46	14.3733	13.5667	11.1833	13.4833	9.39667		12	12.58	12.8	0.41328	14.56	14	14.56	0.323316	13.25	13.89	13.56	0.320052		11.1	11.23	11.22	0.0723418	13.56	13	13.89	0.449926	9.23	9.54	9.42	0.156312

## Sheet: MIC_antibac
				Gram-positive			Gram-negative
				B. cereus	S. aureus	S. epidermidis	E. coli	P. aeruginosa	S. typhimurium
			MFLUCC15-1112	31.25	62.5	125	250	500	500
			MFLUCC15-1113	1000	1000	1000	0	500	0
			MFLUCC15-1130	3.91	31.25	3.91	125	500	250
			MFLUCC15-1131	3.91	31.25	3.91	125	250	250
			MFLUCC15-1132	1000	1000	1000	1000	1000	1000
			MFLUCC15-1133	7.81	62.5	31.25	250	500	250
			MFLUCC15-1134	500	500	1000	1000	0	0
			MFLUCC15-1135	250	500	125	125	250	1000
			MFLUCC15-1136	250	1000	500	125	500	1000
			MFLUCC15-1137	1000	1000	500	500	0	1000
			MFLUCC15-1138	500	62.5	1000	125	500	500
conc. 1000
	Gram-positive			Gram-negative
	B. cereus	S. aureus	S. epidermidis	E. coli	P. aeruginosa	S. typhimurium		B. cereus				S. aureus				S. epidermidis					E. coli				P. aeruginosa				S. typhimurium
								1	2	3	SD	1	2	3	SD	1	2	3	SD		1	2	3	SD	1	2	3	SD	1	2	3	SD
MFLUCC15-1112	11.2833	10.2067	8.96	8.07333	8.77	8.45		11.12	11.23	11.5	0.195533	10.1	10.3	10.22	0.100664	9.1	8.9	8.88	0.121655		8	8	8.22	0.127017	8.66	8.77	8.88	0.11	8.22	8.54	8.59	0.200749
MFLUCC15-1113	8.37333	7.20667	7.35333	0	7.91667	0		8.56	8.2	8.36	0.18037	7.1	7.2	7.32	0.110151	7.52	7.21	7.33	0.156312		0	0	0	0	7.88	7.88	7.99	0.0635085	0	0	0	0
MFLUCC15-1130	14.1233	11.7167	13.45	10.75	9.67333	9.10667		14.12	14	14.25	0.125033	12	11.52	11.63	0.251462	13.25	13.5	13.6	0.180278		10.58	10.98	10.69	0.20664	9.65	9.63	9.74	0.0585947	9	9	9.32	0.184752
MFLUCC15-1131	14.37	12.7467	13.1167	10.4033	10.4033	9.22667		14.23	14.53	14.35	0.150997	12.35	12.85	13.04	0.356417	13.14	12.96	13.25	0.146401		10.33	10.22	10.66	0.228983	10.25	10.33	10.63	0.200333	9.12	9.23	9.33	0.10504
MFLUCC15-1132	8.26	7.77667	8.58333	7.35333	6.99333	7.04		8.25	8.26	8.27	0.01	7.56	7.89	7.88	0.187705	8.56	8.96	8.23	0.365559		7.52	7	7.54	0.306159	6.88	6.99	7.11	0.115036	7.12	7	7	0.069282
MFLUCC15-1133	12.4467	10.5733	11.1667	8.46333	8.16667	9.06		12.45	12.56	12.33	0.115036	10.89	10.56	10.27	0.310215	11.12	11	11.38	0.194251		8.5	8.33	8.56	0.119304	8.12	8.22	8.16	0.0503322	8.98	8.99	9.21	0.13
MFLUCC15-1134	8.55333	9.25	9.15	6.68333	0	0		8.56	8.44	8.66	0.110151	9.32	9.21	9.22	0.0608276	9.21	9.23	9.01	0.121655		6.58	6.88	6.59	0.170392	0	0	0	0	0	0	0	0
MFLUCC15-1135	10.42	9.54	10.57	9.13333	9.27333	7.65		10.12	10.56	10.58	0.26	9.63	9.25	9.74	0.257099	10.52	10.23	10.96	0.36756		9.12	9.1	9.18	0.0416333	9.1	9.2	9.52	0.219393	7.5	7.6	7.85	0.180278
MFLUCC15-1136	10.0733	7.13667	7.37333	9.11	8.92333	7.80667		10.22	10	10	0.127017	7.21	7	7.2	0.118462	7.3	7.52	7.3	0.127017		9	9.15	9.18	0.0964365	8.95	8.88	8.94	0.0378594	7.88	7.66	7.88	0.127017
MFLUCC15-1137	7.04	7.07333	7.1	7.76333	0	6.94		7.11	7.01	7	0.0608276	7	7	7.22	0.127017	7.25	7	7.05	0.132288		7.5	7.8	7.99	0.247049	0	0	0	0	6.8	6.9	7.12	0.163707
MFLUCC15-1138	9.70333	10.2567	7.14	9.62333	9.25667	8.12		9.99	9.32	9.8	0.345302	10.2	10.21	10.36	0.0896289	7.12	7	7.3	0.150997		9.5	9.6	9.77	0.136504	9.3	9.22	9.25	0.0404145	8.11	8.12	8.13	0.01
Chloramphenicol	12.46	14.3733	13.5667	11.1833	13.4833	9.39667		12	12.58	12.8	0.41328	14.56	14	14.56	0.323316	13.25	13.89	13.56	0.320052		11.1	11.23	11.22	0.0723418	13.56	13	13.89	0.449926	9.23	9.54	9.42	0.156312
conc. 500
	Gram-positive			Gram-negative
	B. cereus	S. aureus	S. epidermidis	E. coli	P. aeruginosa	S. typhimurium		B. cereus				S. aureus				S. epidermidis					E. coli				P. aeruginosa				S. typhimurium
								1	2	3	SD	1	2	3	SD	1	2	3	SD		1	2	3	SD	1	2	3	SD	1	2	3	SD
MFLUCC15-1112	11.1433	10	9.01667	7.67667	7.63667	7.83		11	11.2	11.23	0.125033	10.1	10.1	9.8	0.173205	9	9.02	9.03	0.0152753		7.5	7.85	7.68	0.175024	7.5	7.56	7.85	0.187172	7.63	7.98	7.88	0.180278
MFLUCC15-1113	0	0	0	0	8.26667	0		0	0	0	0	0	0	0	0	0	0	0	0		0	0	0	0	8.3	8.2	8.3	0.057735	0	0	0	0
MFLUCC15-1130	13.5	11.88	12.88	9.62	8.54667	8.16		13.2	13.8	13.5	0.3	11.85	11.9	11.89	0.0264575	12.87	12.88	12.89	0.01		9.58	9.65	9.63	0.0360555	8.56	8.45	8.63	0.0907377	8	8.25	8.23	0.138924
MFLUCC15-1131	13.6233	12.11	12.85	10.1267	9.76	8.66667		13.58	13.6	13.69	0.0585947	12	12.1	12.23	0.115326	12.89	12.88	12.78	0.0608276		10.1	10.23	10.05	0.0929157	9.85	9.87	9.56	0.173494	8.68	8.69	8.63	0.0321455
MFLUCC15-1132	0	0	0	0	0	0		0	0	0	0	0	0	0	0	0	0	0	0		0	0	0	0	0	0	0	0	0	0	0	0
MFLUCC15-1133	12.0667	10.0333	10.3333	8.16667	7.66667	8.2		12	12.2	12	0.11547	10	10.1	10	0.057735	10.5	10.2	10.3	0.152753		8	8.2	8.3	0.152753	7.8	7.7	7.5	0.152753	8	8.2	8.4	0.2
MFLUCC15-1134	8.06667	8.76667	0	0	0	0		8	8	8.2	0.11547	8.8	8.6	8.9	0.152753	0	0	0	0		0	0	0	0	0	0	0	0	0	0	0	0
MFLUCC15-1135	9.73333	7.73333	9.76667	8.83333	8.63333	0		9.8	9.8	9.6	0.11547	7.5	7.8	7.9	0.208167	9.8	9.8	9.7	0.057735		8.8	8.8	8.9	0.057735	8.7	8.7	8.5	0.11547	0	0	0	0
MFLUCC15-1136	9.6	0	7.43333	8.9	7.93333	0		9.5	9.5	9.8	0.173205	0	0	0	0	7.3	7.5	7.5	0.11547		8.8	8.9	9	0.1	8	7.8	8	0.11547	0	0	0	0
MFLUCC15-1137	0	0	7.16667	7	0	0		0	0	0	0	0	0	0	0	7	7.2	7.3	0.152753		7	7	7	0	0	0	0	0	0	0	0	0
MFLUCC15-1138	8.06667	10.0333	0	8.66667	8	7.63333		8	8	8.2	0.11547	10	10	10.1	0.057735	0	0	0	0		8.8	8.7	8.5	0.152753	8	8	8	0	7.6	7.5	7.8	0.152753
conc. 250
	Gram-positive			Gram-negative
	B. cereus	S. aureus	S. epidermidis	E. coli	P. aeruginosa	S. typhimurium		B. cereus				S. aureus				S. epidermidis					E. coli				P. aeruginosa				S. typhimurium
								1	2	3	SD	1	2	3	SD	1	2	3	SD		1	2	3	SD	1	2	3	SD	1	2	3	SD
MFLUCC15-1112	10.4333	9.8	8.2	7.67667	0	0		10.5	10.4	10.4	0.057735	9.8	9.8	9.8	0	8.3	8.3	8	0.173205		7.5	7.85	7.68	0.175024	0	0	0	0	0	0	0	0
MFLUCC15-1113	0	0	0	0	0	0		0	0	0	0	0	0	0	0	0	0	0	0		0	0	0	0	0	0	0	0	0	0	0	0
MFLUCC15-1130	12.7	10.9333	12.0667	8.13333	0	7.53333		12.8	12.8	12.5	0.173205	11	11	10.8	0.11547	12	12.1	12.1	0.057735		8.3	8	8.1	0.152753	0	0	0	0	7.6	7.5	7.5	0.057735
MFLUCC15-1131	13.0333	11.4	12	9.3	8.93333	7.86667		13	13	13.1	0.057735	11.5	11.2	11.5	0.173205	12	12	12	0		9.2	9.2	9.5	0.173205	9	9	8.8	0.11547	8	8	7.6	0.23094
MFLUCC15-1132	0	0	0	0	0	0		0	0	0	0	0	0	0	0	0	0	0	0		0	0	0	0	0	0	0	0	0	0	0	0
MFLUCC15-1133	11.5667	9.83333	10	7.36667	0	7.1		11.5	11.5	11.7	0.11547	9.8	9.8	9.9	0.057735	10	10	10	0		7.3	7.3	7.5	0.11547	0	0	0	0	7	7	7.3	0.173205
MFLUCC15-1134	0	8.76667	0	0	0	0		0	0	0	0	8.8	8.6	8.9	0.152753	0	0	0	0		0	0	0	0	0	0	0	0	0	0	0	0
MFLUCC15-1135	8.33333	0	8.53333	7.93333	8.26667	0		8.5	8.3	8.2	0.152753	0	0	0	0	8.5	8.5	8.6	0.057735		8	8	7.8	0.11547	8.5	8	8.3	0.251661	0	0	0	0
MFLUCC15-1136	8.86667	0	0	8	0	0		9	8.8	8.8	0.11547	0	0	0	0	0	0	0	0		8	8	8	0	0	0	0	0	0	0	0	0
MFLUCC15-1137	0	0	0	0	0	0		0	0	0	0	0	0	0	0	0	0	0	0		0	0	0	0	0	0	0	0	0	0	0	0
MFLUCC15-1138	0	9.7	0	8.1	0	0		0	0	0	0	9.8	9.5	9.8	0.173205	0	0	0	0		8	8	8.3	0.173205	0	0	0	0	0	0	0	0
conc. 125
	Gram-positive			Gram-negative
	B. cereus	S. aureus	S. epidermidis	E. coli	P. aeruginosa	S. typhimurium		B. cereus				S. aureus				S. epidermidis					E. coli				P. aeruginosa				S. typhimurium
								1	2	3	SD	1	2	3	SD	1	2	3	SD		1	2	3	SD	1	2	3	SD	1	2	3	SD
MFLUCC15-1112	10.0667	9.46667	7.83333	0	0	0		10	10	10.2	0.11547	9.5	9.4	9.5	0.057735	8	7.8	7.7	0.152753		0	0	0	0	0	0	0	0	0	0	0	0
MFLUCC15-1113	0	0	0	0	0	0		0	0	0	0	0	0	0	0	0	0	0	0		0	0	0	0	0	0	0	0	0	0	0	0
MFLUCC15-1130	12.1	10.5333	11.0667	7	0	0		12	12	12.3	0.173205	10.6	10.4	10.6	0.11547	11.2	11	11	0.11547		7	7	7	0	0	0	0	0	0	0	0	0
MFLUCC15-1131	12.4667	10.9333	11	8	0	0		12.5	12.5	12.4	0.057735	11	11	10.8	0.11547	11	11	11	0		8	8	8	0	0	0	0	0	0	0	0	0
MFLUCC15-1132	0	0	0	0	0	0		0	0	0	0	0	0	0	0	0	0	0	0		0	0	0	0	0	0	0	0	0	0	0	0
MFLUCC15-1133	10.4333	9	9.26667	0	0	0		10.5	10.5	10.3	0.11547	9	9	9	0	9.5	9.3	9	0.251661		0	0	0	0	0	0	0	0	0	0	0	0
MFLUCC15-1134	0	8.76667	0	0	0	0		0	0	0	0	8.8	8.6	8.9	0.152753	0	0	0	0		0	0	0	0	0	0	0	0	0	0	0	0
MFLUCC15-1135	0	0	7.93333	7.73333	0	0		0	0	0	0	0	0	0	0	8	8	7.8	0.11547		7.8	7.7	7.7	0.057735	0	0	0	0	0	0	0	0
MFLUCC15-1136	0	0	0	7.4	0	0		0	0	0	0	0	0	0	0	0	0	0	0		7.5	7.5	7.2	0.173205	0	0	0	0	0	0	0	0
MFLUCC15-1137	0	0	0	0	0	0		0	0	0	0	0	0	0	0	0	0	0	0		0	0	0	0	0	0	0	0	0	0	0	0
MFLUCC15-1138	0	9.06667	0	7.6	0	0		0	0	0	0	9	9	9.2	0.11547	0	0	0	0		7.8	7.5	7.5	0.173205	0	0	0	0	0	0	0	0
conc. 62.5
	Gram-positive			Gram-negative
	B. cereus	S. aureus	S. epidermidis	E. coli	P. aeruginosa	S. typhimurium		B. cereus				S. aureus				S. epidermidis					E. coli				P. aeruginosa				S. typhimurium
								1	2	3	SD	1	2	3	SD	1	2	3	SD		1	2	3	SD	1	2	3	SD	1	2	3	SD
MFLUCC15-1112	8.7	7.86667	0	0	0	0		8.8	8.5	8.8	0.173205	8	8	7.6	0.23094	0	0	0	0		0	0	0	0	0	0	0	0	0	0	0	0
MFLUCC15-1113	0	0	0	0	0	0		0	0	0	0	0	0	0	0	0	0	0	0		0	0	0	0	0	0	0	0	0	0	0	0
MFLUCC15-1130	11.1	10.0667	10.2667	0	0	0		11	11	11.3	0.173205	10	10	10.2	0.11547	10.4	10.2	10.2	0.11547		0	0	0	0	0	0	0	0	0	0	0	0
MFLUCC15-1131	11.9333	10.2667	10.0333	0	0	0		12	12	11.8	0.11547	10.2	10.2	10.4	0.11547	10	10	10.1	0.057735		0	0	0	0	0	0	0	0	0	0	0	0
MFLUCC15-1132	0	0	0	0	0	0		0	0	0	0	0	0	0	0	0	0	0	0		0	0	0	0	0	0	0	0	0	0	0	0
MFLUCC15-1133	10	8.36667	9	0	0	0		10	10	10	0	8.5	8.3	8.3	0.11547	9	9	9	0		0	0	0	0	0	0	0	0	0	0	0	0
MFLUCC15-1134	0	8.76667	0	0	0	0		0	0	0	0	8.8	8.6	8.9	0.152753	0	0	0	0		0	0	0	0	0	0	0	0	0	0	0	0
MFLUCC15-1135	0	0	0	0	0	0		0	0	0	0	0	0	0	0	0	0	0	0		0	0	0	0	0	0	0	0	0	0	0	0
MFLUCC15-1136	0	0	0	0	0	0		0	0	0	0	0	0	0	0	0	0	0	0		0	0	0	0	0	0	0	0	0	0	0	0
MFLUCC15-1137	0	0	0	0	0	0		0	0	0	0	0	0	0	0	0	0	0	0		0	0	0	0	0	0	0	0	0	0	0	0
MFLUCC15-1138	0	7.86667	0	0	0	0		0	0	0	0	8	8	7.6	0.23094	0	0	0	0		0	0	0	0	0	0	0	0	0	0	0	0
conc. 31.25
	Gram-positive			Gram-negative
	B. cereus	S. aureus	S. epidermidis	E. coli	P. aeruginosa	S. typhimurium		B. cereus				S. aureus				S. epidermidis					E. coli				P. aeruginosa				S. typhimurium
								1	2	3	SD	1	2	3	SD	1	2	3	SD		1	2	3	SD	1	2	3	SD	1	2	3	SD
MFLUCC15-1112	7.4	0	0	0	0	0		7.7	7.5	7	0.360555	0	0	0	0	0	0	0	0		0	0	0	0	0	0	0	0	0	0	0	0
MFLUCC15-1113	0	0	0	0	0	0		0	0	0	0	0	0	0	0	0	0	0	0		0	0	0	0	0	0	0	0	0	0	0	0
MFLUCC15-1130	10.0667	9.1	9.5	0	0	0		10	10.1	10.1	0.057735	9	9.1	9.2	0.1	9.5	9.5	9.5	0		0	0	0	0	0	0	0	0	0	0	0	0
MFLUCC15-1131	11	10	9.5	0	0	0		11	11	11	0	10	10	10	0	9.5	9.5	9.5	0		0	0	0	0	0	0	0	0	0	0	0	0
MFLUCC15-1132	0	0	0	0	0	0		0	0	0	0	0	0	0	0	0	0	0	0		0	0	0	0	0	0	0	0	0	0	0	0
MFLUCC15-1133	9.56667	0	7.83333	0	0	0		9.7	9.5	9.5	0.11547	0	0	0	0	8	8	7.5	0.288675		0	0	0	0	0	0	0	0	0	0	0	0
MFLUCC15-1134	0	0	0	0	0	0		0	0	0	0	0	0	0	0	0	0	0	0		0	0	0	0	0	0	0	0	0	0	0	0
MFLUCC15-1135	0	0	0	0	0	0		0	0	0	0	0	0	0	0	0	0	0	0		0	0	0	0	0	0	0	0	0	0	0	0
MFLUCC15-1136	0	0	0	0	0	0		0	0	0	0	0	0	0	0	0	0	0	0		0	0	0	0	0	0	0	0	0	0	0	0
MFLUCC15-1137	0	0	0	0	0	0		0	0	0	0	0	0	0	0	0	0	0	0		0	0	0	0	0	0	0	0	0	0	0	0
MFLUCC15-1138	0	0	0	0	0	0		0	0	0	0	0	0	0	0	0	0	0	0		0	0	0	0	0	0	0	0	0	0	0	0
conc. 15.62
	Gram-positive			Gram-negative
	B. cereus	S. aureus	S. epidermidis	E. coli	P. aeruginosa	S. typhimurium		B. cereus				S. aureus				S. epidermidis					E. coli				P. aeruginosa				S. typhimurium
								1	2	3	SD	1	2	3	SD	1	2	3	SD		1	2	3	SD	1	2	3	SD	1	2	3	SD
MFLUCC15-1112	0	0	0	0	0	0		0	0	0	0	0	0	0	0	0	0	0	0		0	0	0	0	0	0	0	0	0	0	0	0
MFLUCC15-1113	0	0	0	0	0	0		0	0	0	0	0	0	0	0	0	0	0	0		0	0	0	0	0	0	0	0	0	0	0	0
MFLUCC15-1130	9.43333	0	8.5	0	0	0		9.5	9.5	9.3	0.11547	0	0	0	0	8.5	8.5	8.5	0		0	0	0	0	0	0	0	0	0	0	0	0
MFLUCC15-1131	10.3333	0	8.83333	0	0	0		11	10	10	10.5	0	0	0	0	9	8.8	8.7	0.152753		0	0	0	0	0	0	0	0	0	0	0	0
MFLUCC15-1132	0	0	0	0	0	0		0	0	0	0	0	0	0	0	0	0	0	0		0	0	0	0	0	0	0	0	0	0	0	0
MFLUCC15-1133	8.63333	0	0	0	0	0		8.8	8.8	8.3	0.288675	0	0	0	0	0	0	0	0		0	0	0	0	0	0	0	0	0	0	0	0
MFLUCC15-1134	0	0	0	0	0	0		0	0	0	0	0	0	0	0	0	0	0	0		0	0	0	0	0	0	0	0	0	0	0	0
MFLUCC15-1135	0	0	0	0	0	0		0	0	0	0	0	0	0	0	0	0	0	0		0	0	0	0	0	0	0	0	0	0	0	0
MFLUCC15-1136	0	0	0	0	0	0		0	0	0	0	0	0	0	0	0	0	0	0		0	0	0	0	0	0	0	0	0	0	0	0
MFLUCC15-1137	0	0	0	0	0	0		0	0	0	0	0	0	0	0	0	0	0	0		0	0	0	0	0	0	0	0	0	0	0	0
MFLUCC15-1138	0	0	0	0	0	0		0	0	0	0	0	0	0	0	0	0	0	0		0	0	0	0	0	0	0	0	0	0	0	0
conc. 7.81
	Gram-positive			Gram-negative
	B. cereus	S. aureus	S. epidermidis	E. coli	P. aeruginosa	S. typhimurium		B. cereus				S. aureus				S. epidermidis					E. coli				P. aeruginosa				S. typhimurium
								1	2	3	SD	1	2	3	SD	1	2	3	SD		1	2	3	SD	1	2	3	SD	1	2	3	SD
MFLUCC15-1112	0	0	0	0	0	0		0	0	0	0	0	0	0	0	0	0	0	0		0	0	0	0	0	0	0	0	0	0	0	0
MFLUCC15-1113	0	0	0	0	0	0		0	0	0	0	0	0	0	0	0	0	0	0		0	0	0	0	0	0	0	0	0	0	0	0
MFLUCC15-1130	8.83333	0	7.86667	0	0	0		9	9	8.5	0.288675	0	0	0	0	8	8	7.6	0.23094		0	0	0	0	0	0	0	0	0	0	0	0
MFLUCC15-1131	10.0333	0	7.66667	0	0	0		10	10	10.1	0.057735	0	0	0	0	8	7.5	7.5	0.288675		0	0	0	0	0	0	0	0	0	0	0	0
MFLUCC15-1132	0	0	0	0	0	0		0	0	0	0	0	0	0	0	0	0	0	0		0	0	0	0	0	0	0	0	0	0	0	0
MFLUCC15-1133	7.6	0	0	0	0	0		8	7.5	7.3	0.360555	0	0	0	0	0	0	0	0		0	0	0	0	0	0	0	0	0	0	0	0
MFLUCC15-1134	0	0	0	0	0	0		0	0	0	0	0	0	0	0	0	0	0	0		0	0	0	0	0	0	0	0	0	0	0	0
MFLUCC15-1135	0	0	0	0	0	0		0	0	0	0	0	0	0	0	0	0	0	0		0	0	0	0	0	0	0	0	0	0	0	0
MFLUCC15-1136	0	0	0	0	0	0		0	0	0	0	0	0	0	0	0	0	0	0		0	0	0	0	0	0	0	0	0	0	0	0
MFLUCC15-1137	0	0	0	0	0	0		0	0	0	0	0	0	0	0	0	0	0	0		0	0	0	0	0	0	0	0	0	0	0	0
MFLUCC15-1138	0	0	0	0	0	0		0	0	0	0	0	0	0	0	0	0	0	0		0	0	0	0	0	0	0	0	0	0	0	0
conc. 3.91
	Gram-positive			Gram-negative
	B. cereus	S. aureus	S. epidermidis	E. coli	P. aeruginosa	S. typhimurium		B. cereus				S. aureus				S. epidermidis					E. coli				P. aeruginosa				S. typhimurium
								1	2	3	SD	1	2	3	SD	1	2	3	SD		1	2	3	SD	1	2	3	SD	1	2	3	SD
MFLUCC15-1112	0	0	0	0	0	0		0	0	0	0	0	0	0	0	0	0	0	0		0	0	0	0	0	0	0	0	0	0	0	0
MFLUCC15-1113	0	0	0	0	0	0		0	0	0	0	0	0	0	0	0	0	0	0		0	0	0	0	0	0	0	0	0	0	0	0
MFLUCC15-1130	8.06667	0	7.33333	0	0	0		8.2	8	8	0.11547	0	0	0	0	7.3	7.5	7.2	0.152753		0	0	0	0	0	0	0	0	0	0	0	0
MFLUCC15-1131	8.53333	0	7.1	0	0	0		8.5	8.6	8.5	0.057735	0	0	0	0	7.3	7	7	0.173205		0	0	0	0	0	0	0	0	0	0	0	0
MFLUCC15-1132	0	0	0	0	0	0		0	0	0	0	0	0	0	0	0	0	0	0		0	0	0	0	0	0	0	0	0	0	0	0
MFLUCC15-1133	0	0	0	0	0	0		0	0	0	0	0	0	0	0	0	0	0	0		0	0	0	0	0	0	0	0	0	0	0	0
MFLUCC15-1134	0	0	0	0	0	0		0	0	0	0	0	0	0	0	0	0	0	0		0	0	0	0	0	0	0	0	0	0	0	0
MFLUCC15-1135	0	0	0	0	0	0		0	0	0	0	0	0	0	0	0	0	0	0		0	0	0	0	0	0	0	0	0	0	0	0
MFLUCC15-1136	0	0	0	0	0	0		0	0	0	0	0	0	0	0	0	0	0	0		0	0	0	0	0	0	0	0	0	0	0	0
MFLUCC15-1137	0	0	0	0	0	0		0	0	0	0	0	0	0	0	0	0	0	0		0	0	0	0	0	0	0	0	0	0	0	0
MFLUCC15-1138	0	0	0	0	0	0		0	0	0	0	0	0	0	0	0	0	0	0		0	0	0	0	0	0	0	0	0	0	0	0

## Sheet: Antifungal
				C. albicans					A. niger
				1	2	3		SD	1	2	3	Av	SD
			Endophytic fungal extract				C. albicans					A. niger
			MFLUCC15-1112	35.62	35	35.2	35.2733	0.316439	38.5	39.6	39.99	39.3633	0.772679
			MFLUCC15-1113	26.5	28.9	28.88	28.0933	1.3799	0	0	0	0	0
			MFLUCC15-1130	65.22	66.32	68.52	66.6867	1.68028	74.2	75	78.6	75.9333	2.34379
			MFLUCC15-1131	60.3	58.32	62.32	60.3133	2.00003	75.8	79.63	78.23	77.8867	1.93795
			MFLUCC15-1132	50.25	50	50	50.0833	0.144338	35	36.2	34.22	35.14	0.997397
			MFLUCC15-1133	40.52	44	43	42.5067	1.79168	45	44	43.85	44.2833	0.625167
			MFLUCC15-1134	0	0	0	0	0	32	33.2	31.54	32.2467	0.857049
			MFLUCC15-1135	40.23	41.22	40.33	40.5933	0.545008	45.5	45.36	45.23	45.3633	0.135031
			MFLUCC15-1136	48.5	48.9	48	48.4667	0.450925	57	58	57.24	57.4133	0.522047
			MFLUCC15-1137	0	0	0	0	0	0	0	0	0	0
			MFLUCC15-1138	38	39	40.23	39.0767	1.11698	35.6	35.96	30.25	33.9367	3.19782
			Endophytic fungal extract	C. albicans	A. niger
			MFLUCC15-1112	1000	1000
			MFLUCC15-1113	1000	0
			MFLUCC15-1130	62.5	31.25
			MFLUCC15-1131	62.5	62.5
			MFLUCC15-1132	250	1000
			MFLUCC15-1133	125	125
			MFLUCC15-1134	0	1000
			MFLUCC15-1135	250	250
			MFLUCC15-1136	125	125
			MFLUCC15-1137	0	0
			MFLUCC15-1138	500	500
			conc. 1000	C. albicans					A. niger
				1	2	3		SD	1	2	3	Av	SD
			Endophytic fungal extract				C. albicans					A. niger
			MFLUCC15-1112	35.62	35	35.2	35.2733	0.316439	38.5	39.6	39.99	39.3633	0.772679
			MFLUCC15-1113	26.5	28.9	28.88	28.0933	1.3799	0	0	0	0	0
			MFLUCC15-1130	65.22	66.32	68.52	66.6867	1.68028	74.2	75	78.6	75.9333	2.34379
			MFLUCC15-1131	60.3	58.32	62.32	60.3133	2.00003	75.8	79.63	78.23	77.8867	1.93795
			MFLUCC15-1132	50.25	50	50	50.0833	0.144338	35	36.2	34.22	35.14	0.997397
			MFLUCC15-1133	40.52	44	43	42.5067	1.79168	45	44	43.85	44.2833	0.625167
			MFLUCC15-1134	0	0	0	0	0	32	33.2	31.54	32.2467	0.857049
			MFLUCC15-1135	40.23	41.22	40.33	40.5933	0.545008	45.5	45.36	45.23	45.3633	0.135031
			MFLUCC15-1136	48.5	48.9	48	48.4667	0.450925	57	58	57.24	57.4133	0.522047
			MFLUCC15-1137	0	0	0	0	0	0	0	0	0	0
			MFLUCC15-1138	38	39	40.23	39.0767	1.11698	35.6	35.96	30.25	33.9367	3.19782
			conc. 500	C. albicans					A. niger
				1	2	3		SD	1	2	3	Av	SD
			Endophytic fungal extract				C. albicans					A. niger
			MFLUCC15-1112	0	0	0	0	0	0	0	0	0	0
			MFLUCC15-1113	0	0	0	0	0	0	0	0	0	0
			MFLUCC15-1130	60	60	60.23	60.0767	0.132791	65	65.23	63.21	64.48	1.10585
			MFLUCC15-1131	59.23	55.14	55.26	56.5433	2.3275	70.23	70.56	75.56	72.1167	2.98658
			MFLUCC15-1132	45.24	45.26	45	45.1667	0.144684	0	0	0	0	0
			MFLUCC15-1133	38.15	38.25	38	38.1333	0.125831	42.15	42.36	40.25	41.5867	1.16234
			MFLUCC15-1134	0	0	0	0	0	0	0	0	0	0
			MFLUCC15-1135	38.54	38	38.79	38.4433	0.403774	42.25	42.89	43.56	42.9	0.655057
			MFLUCC15-1136	40.14	48.9	48	45.68	4.81884	57	58	57.24	57.4133	0.522047
			MFLUCC15-1137	0	0	0	0	0	0	0	0	0	0
			MFLUCC15-1138	39	39.09	39	39.03	0.0519615	33	33	33.89	33.2967	0.513842
			conc. 250	C. albicans					A. niger
				1	2	3		SD	1	2	3	Av	SD
			Endophytic fungal extract				C. albicans					A. niger
			MFLUCC15-1112	0	0	0	0	0	0	0	0	0	0
			MFLUCC15-1113	0	0	0	0	0	0	0	0	0	0
			MFLUCC15-1130	55.87	55	53.07	54.6467	1.43305	60.58	62.38	63.89	62.2833	1.65712
			MFLUCC15-1131	50.36	50.69	50.78	50.61	0.221133	68.98	68.27	63.89	67.0467	2.75671
			MFLUCC15-1132	45.05	45.09	40.58	43.5733	2.59238	0	0	0	0	0
			MFLUCC15-1133	38	38	38.15	38.05	0.0866025	38.59	38.79	38.42	38.6	0.185203
			MFLUCC15-1134	0	0	0	0	0	0	0	0	0	0
			MFLUCC15-1135	34.78	33.56	33.89	34.0767	0.631057	38.87	38.96	37.24	38.3567	0.968108
			MFLUCC15-1136	35.65	35.21	35.89	35.5833	0.344867	50.25	50.89	50.63	50.59	0.32187
			MFLUCC15-1137	0	0	0	0	0	0	0	0	0	0
			MFLUCC15-1138	0	0	0	0	0	0	0	0	0	0
			conc. 125	C. albicans					A. niger
				1	2	3		SD	1	2	3	Av	SD
			Endophytic fungal extract				C. albicans					A. niger
			MFLUCC15-1112	0	0	0	0	0	0	0	0	0	0
			MFLUCC15-1113	0	0	0	0	0	0	0	0	0	0
			MFLUCC15-1130	50.23	50.78	50.89	50.6333	0.353601	55.89	55.67	52.39	54.65	1.96031
			MFLUCC15-1131	48.59	49.36	48.36	48.77	0.523737	60.58	60.36	60.89	60.61	0.266271
			MFLUCC15-1132	0	0	0	0	0	0	0	0	0	0
			MFLUCC15-1133	35.25	35.58	30.25	33.6933	2.98658	35.26	35.26	39.36	36.6267	2.36714
			MFLUCC15-1134	0	0	0	0	0	0	0	0	0	0
			MFLUCC15-1135	0	0	0	0	0	0	0	0	0	0
			MFLUCC15-1136	30.14	30.65	30.89	30.56	0.383014	43.25	40.89	40.68	41.6067	1.42704
			MFLUCC15-1137	0	0	0	0	0	0	0	0	0	0
			MFLUCC15-1138	0	0	0	0	0	0	0	0	0	0
			conc. 62.5	C. albicans					A. niger
				1	2	3		SD	1	2	3	Av	SD
			Endophytic fungal extract				C. albicans					A. niger
			MFLUCC15-1112	0	0	0	0	0	0	0	0	0	0
			MFLUCC15-1113	0	0	0	0	0	0	0	0	0	0
			MFLUCC15-1130	38.56	38.56	38.63	38.5833	0.0404145	40.36	40.89	43.25	41.5	1.53854
			MFLUCC15-1131	30.25	30	30.12	30.1233	0.125033	35.26	35.24	33.25	34.5833	1.15474
			MFLUCC15-1132	0	0	0	0	0	0	0	0	0	0
			MFLUCC15-1133	0	0	0	0	0	0	0	0	0	0
			MFLUCC15-1134	0	0	0	0	0	0	0	0	0	0
			MFLUCC15-1135	0	0	0	0	0	0	0	0	0	0
			MFLUCC15-1136	0	0	0	0	0	0	0	0	0	0
			MFLUCC15-1137	0	0	0	0	0	0	0	0	0	0
			MFLUCC15-1138	0	0	0	0	0	0	0	0	0	0
			conc. 31.25	C. albicans					A. niger
				1	2	3		SD	1	2	3	Av	SD
			Endophytic fungal extract				C. albicans					A. niger
			MFLUCC15-1112	0	0	0	0	0	0	0	0	0	0
			MFLUCC15-1113	0	0	0	0	0	0	0	0	0	0
			MFLUCC15-1130	0	0	0	0	0	30.25	30.75	25.36	28.7867	2.97809
			MFLUCC15-1131	0	0	0	0	0	0	0	0	0	0
			MFLUCC15-1132	0	0	0	0	0	0	0	0	0	0
			MFLUCC15-1133	0	0	0	0	0	0	0	0	0	0
			MFLUCC15-1134	0	0	0	0	0	0	0	0	0	0
			MFLUCC15-1135	0	0	0	0	0	0	0	0	0	0
			MFLUCC15-1136	0	0	0	0	0	0	0	0	0	0
			MFLUCC15-1137	0	0	0	0	0	0	0	0	0	0
			MFLUCC15-1138	0	0	0	0	0	0	0	0	0	0
			conc. 15.62	C. albicans					A. niger
				1	2	3		SD	1	2	3	Av	SD
			Endophytic fungal extract				C. albicans					A. niger
			MFLUCC15-1112	0	0	0	0	0	0	0	0	0	0
			MFLUCC15-1113	0	0	0	0	0	0	0	0	0	0
			MFLUCC15-1130	0	0	0	0	0	0	0	0	0	0
			MFLUCC15-1131	0	0	0	0	0	0	0	0	0	0
			MFLUCC15-1132	0	0	0	0	0	0	0	0	0	0
			MFLUCC15-1133	0	0	0	0	0	0	0	0	0	0
			MFLUCC15-1134	0	0	0	0	0	0	0	0	0	0
			MFLUCC15-1135	0	0	0	0	0	0	0	0	0	0
			MFLUCC15-1136	0	0	0	0	0	0	0	0	0	0
			MFLUCC15-1137	0	0	0	0	0	0	0	0	0	0
			MFLUCC15-1138	0	0	0	0	0	0	0	0	0	0
