# Supplementary material for: Production of eugenol from fungal endophytes Neopestalotiopsis sp. and Diaporthe sp. isolated from Cinnamomum loureiroi leaves
Source: PeerJ. 2019 Feb 12;7:e6427. doi: 10.7717/peerj.6427 (PMC6376936; doi:10.7717/peerj.6427)
Supplement: Supplemental Information 3 — Each sheet presents absorbance at 517 nm and %inhibition including IC50 obtained by DPPH assay. [file peerj-07-6427-s003.xlsx]

## Sheet: Ic50
		Crude extract/standard	IC50 (µg/mL)
		Pestalotiopsis sp. MFLUCC15-1112	>1000
		Colletotrichum sp. MFLUCC15-1113	>1000
		Neopestalotiopsis sp. MFLUCC15-1130	22.92±0.67
		Diaporthe sp. MFLUCC15-1131	37.61±0.49
		Botryosphaeria sp. MFLUCC15-1132	543.77±6.59
		Pestalotiopsis sp. MFLUCC15-1133	177.25±2.15
		Colletotrichum sp. MFLUCC15-1134	>1000
		Diaporthe sp. MFLUCC15-1135	195.39±5.55
		Diaporthe sp. MFLUCC15-1136	167.02±1.81
		Colletotrichum sp. MFLUCC15-1137	>1000
		Fusarium sp. MFLUCC15-1138	886.87±4.07
		Trolox	4.47±0.02

## Sheet: Trolox
Standard curve
Trolox (ug/mL)	%inhibition	Abs
0	0	0.463
2	18.3585	0.378
4	38.2289	0.286
6	53.9957	0.213
8	79.6976	0.094
10	93.5205	0.03
Standard curve
Trolox (ug/mL)	%inhibition	Abs
0	0	0.463
2	18.3585	0.372
4	39.5248	0.28
6	54.4276	0.211
8	80.1296	0.092
10	93.7365	0.029
						69.953	1.50517	4.50494
Standard curve						69.523	1.49505	4.45958
Trolox (ug/mL)	%inhibition	Abs				69.339	1.49721	4.46922
0	0	0.463
2	18.3585	0.371					IC50	4.47791
4	38.6609	0.284					SD	0.0238981
6	55.9395	0.204
8	79.6976	0.094
10	92.8726	0.033

## Sheet: MFLUCC15-1112
Standard curve
(ug/mL)	%inhibition	Abs
0	0	0.63
3.91	3.01587	0.611
7.81	4.92063	0.599
15.62	7.93651	0.58
31.25	13.4921	0.545
62.5	18.8889	0.511
125	20.3175	0.502
250	30.1587	0.44
500	36.3492	0.401
1000	44.2857	0.351
							Ic50	In						Ic50	In							Ic50	In
						60.959	8.16084	3501.11
Standard curve						60.57	8.13905	3425.66
(ug/mL)	%inhibition	Abs				59.6609	8.29211	3992.25
0	0	0.633
3.91	3.31754	0.612					IC50	3639.68
7.81	5.37125	0.599					SD	307.659
15.62	8.05687	0.582
31.25	14.06	0.544
62.5	18.7994	0.514
125	20.8531	0.501
250	30.3318	0.441
500	36.6509	0.401
1000	44.3918	0.352
Standard curve
(ug/mL)	%inhibition	Abs
0	0	0.631
3.91	3.32805	0.61
7.81	6.18067	0.592
15.62	8.08241	0.58
31.25	14.2631	0.541
62.5	19.0174	0.511
125	20.7607	0.5
250	29.9525	0.442
500	36.1331	0.403
1000	43.1062	0.359

## Sheet:  MFLUCC15-1113
Standard curve
(ug/mL)	%inhibition	Abs
0	0	0.438
3.91	1.59817	0.431
7.81	2.96804	0.425
15.62	4.3379	0.419
31.25	5.47945	0.414
62.5	8.6758	0.4
125	13.0137	0.381													Ic50	In
250	16.4384	0.366												58.7353	11.8739	143469
500	22.6027	0.339												59.061	11.9115	148976
1000	30.3653	0.305												59.1012	11.867	142486
															AV	144977
															SD	3498.28
Standard curve
(ug/mL)	%inhibition	Abs
0	0	0.436
3.91	1.37615	0.43
7.81	2.29358	0.426
15.62	4.12844	0.418
31.25	5.27523	0.413
62.5	8.25688	0.4
125	12.844	0.38
250	16.055	0.366
500	23.8532	0.332
1000	28.8991	0.31
Standard curve
(ug/mL)	%inhibition	Abs
0	0	0.436
3.91	1.14679	0.431
7.81	2.52294	0.425
15.62	4.12844	0.418
31.25	5.73394	0.411
62.5	7.79817	0.402
125	12.3853	0.382
250	17.2018	0.361
500	23.6239	0.333
1000	28.8991	0.31

## Sheet: MFLUCC15-1130
Standard curve
(ug/mL)	%inhibition	Abs
0	0	0.643
3.91	26.1275	0.475
7.81	37.6361	0.401
15.62	48.5226	0.331
31.25	59.409	0.261
62.5	63.7636	0.233
125	68.7403	0.201
250	73.4059	0.171
500	79.6267	0.131
1000	83.8258	0.104
Standard curve
(ug/mL)	%inhibition	Abs
0	0	0.643
3.91	26.9051	0.47
7.81	37.4806	0.402															Ic50	In
15.62	47.9005	0.335														31.233	3.12339	22.7234
31.25	58.0093	0.27														30.883	3.16411	23.6677
62.5	63.4526	0.235														31.018	3.10767	22.3689
125	67.8072	0.207															Av	22.92
250	72.0062	0.18															SD	0.671348
500	79.0047	0.135
1000	82.7372	0.111
Standard curve
(ug/mL)	%inhibition	Abs
0	0	0.643
3.91	27.5272	0.466
7.81	36.0809	0.411
15.62	48.5226	0.331
31.25	58.9425	0.264
62.5	64.3857	0.229
125	69.8289	0.194
250	74.4946	0.164
500	79.4712	0.132
1000	83.0482	0.109

## Sheet: MFLUCC15-1131
Standard curve
(ug/mL)	%inhibition	Abs
0	0	0.643
3.91	23.0171	0.495
7.81	35.4588	0.415
15.62	42.3017	0.371
31.25	51.633	0.311
62.5	55.3655	0.287
125	62.5194	0.241
250	68.5848	0.202
500	76.5163	0.151
1000	81.182	0.121
Standard curve
(ug/mL)	%inhibition	Abs
0	0	0.643
3.91	23.7947	0.49
7.81	36.0809	0.411															Ic50	In
15.62	42.1462	0.372														36.516	3.6219	37.4086
31.25	51.1664	0.314														35.475	3.61794	37.2608
62.5	55.832	0.284														35.808	3.64217	38.1746
125	62.3639	0.242															Av	37.6147
250	68.4292	0.203															SD	0.490528
500	75.8942	0.155
1000	79.9378	0.129
Standard curve
(ug/mL)	%inhibition	Abs
0	0	0.643
3.91	23.6392	0.491
7.81	35.4588	0.415
15.62	42.4572	0.37
31.25	51.1664	0.314
62.5	55.21	0.288
125	62.0529	0.244
250	67.3406	0.21
500	76.0498	0.154
1000	80.2488	0.127

## Sheet: MFLUCC15-1132
Standard curve
(ug/mL)	%inhibition	Abs
0	0	0.524
3.91	7.63359	0.484
7.81	13.1679	0.455															Ic50	In
15.62	19.4656	0.422														57.2979	6.31243	551.382
31.25	23.2824	0.402														56.5367	6.29213	540.304
62.5	25.9542	0.388														56.4965	6.29088	539.628
125	30.5344	0.364															Av	543.771
250	39.5038	0.317															SD	6.59943
500	50.1908	0.261
1000	62.4046	0.197
Standard curve
(ug/mL)	%inhibition	Abs
0	0	0.524
3.91	8.39695	0.48
7.81	13.7405	0.452
15.62	19.6565	0.421
31.25	23.6641	0.4
62.5	27.6718	0.379
125	30.1527	0.366
250	39.313	0.318
500	49.2366	0.266
1000	63.7405	0.19
Standard curve
(ug/mL)	%inhibition	Abs
0	0	0.524
3.91	8.39695	0.48
7.81	13.9313	0.451
15.62	19.4656	0.422
31.25	23.6641	0.4
62.5	27.8626	0.378
125	29.771	0.368
250	40.0763	0.314
500	48.855	0.268
1000	63.7405	0.19

## Sheet:  MFLUCC15-1133
Standard curve
(ug/mL)	%inhibition	Abs
0	0	0.524
3.91	7.63359	0.484
7.81	13.1679	0.455																Ic50	In
15.62	19.4656	0.422															63.848	5.16653	175.306
31.25	24.6183	0.395															62.966	5.17557	176.898
62.5	33.0153	0.351															61.643	5.19055	179.568
125	42.5573	0.301																Av	177.257
250	54.1985	0.24																SD	2.15358
500	66.0305	0.178
1000	74.6183	0.133
Standard curve
(ug/mL)	%inhibition	Abs
0	0	0.524
3.91	8.39695	0.48
7.81	13.7405	0.452
15.62	19.6565	0.421
31.25	25.5725	0.39
62.5	32.2519	0.355
125	41.9847	0.304
250	54.0076	0.241
500	66.2214	0.177
1000	74.2366	0.135
Standard curve
(ug/mL)	%inhibition	Abs
0	0	0.524
3.91	9.54198	0.474
7.81	14.5038	0.448
15.62	19.8473	0.42
31.25	25.7634	0.389
62.5	33.2061	0.35
125	41.0305	0.309
250	53.626	0.243
500	66.0305	0.178
1000	73.6641	0.138

## Sheet: MFLUCC15-1134
Standard curve
(ug/mL)	%inhibition	Abs
0	0	0.524
3.91	5.53435	0.495
7.81	12.0229	0.461																Ic50	In
15.62	19.6565	0.421															52.351	6.88485	977.352
31.25	27.0992	0.382															62.966	5.17557	176.898
62.5	30.1527	0.366															61.643	5.19055	179.568
125	34.7328	0.342																Av	444.606
250	40.0763	0.314																SD	461.374
500	44.2748	0.292
1000	48.2824	0.271
Standard curve
(ug/mL)	%inhibition	Abs
0	0	0.524
3.91	4.77099	0.499
7.81	11.0687	0.466
15.62	19.4656	0.422
31.25	25.9542	0.388
62.5	31.1069	0.361
125	34.3511	0.344
250	40.6489	0.311
500	44.4656	0.291
1000	47.1374	0.277
Standard curve
(ug/mL)	%inhibition	Abs
0	0	0.524
3.91	6.48855	0.49
7.81	12.0229	0.461
15.62	19.6565	0.421
31.25	27.0992	0.382
62.5	31.2977	0.36
125	35.3053	0.339
250	42.3664	0.302
500	45.0382	0.288
1000	48.855	0.268

## Sheet: MFLUCC15-1135
(ug/mL)	%inhibition	Abs
0	0	0.555
3.91	7.38739	0.514
7.81	12.2523	0.487
15.62	20.5405	0.441
31.25	32.6126	0.374
62.5	42.1622	0.321
125	48.1081	0.288
250	54.2342	0.254
500	58.1982	0.232
1000	62.7027	0.207
Standard curve
(ug/mL)	%inhibition	Abs
0	0	0.555
3.91	7.92793	0.511
7.81	12.0721	0.488																Ic50	In
15.62	20.7207	0.44															56.3715	5.30406	201.151
31.25	33.1532	0.371															56.5403	5.24736	190.064
62.5	41.982	0.322															55.6286	5.27285	194.971
125	48.6486	0.285																Av	195.395
250	54.955	0.25																SD	5.55571
500	58.7387	0.229
1000	63.964	0.2
Standard curve
(ug/mL)	%inhibition	Abs
0	0	0.555
3.91	8.10811	0.51
7.81	13.3333	0.481
15.62	20.9009	0.439
31.25	33.3333	0.37
62.5	41.4414	0.325
125	48.1081	0.288
250	54.2342	0.254
500	60.3604	0.22
1000	62.1622	0.21

[truncated: 3 more sheets: MFLUCC15-1136, MFLUCC15-1137, MFLUCC15-1138]
